# Supplementary material for: The effect of diluted 1% baby shampoo on biofilm reduction in chronic rhinosinusitis with nasal polyposis
Source: PeerJ. 2025 Apr 24;13:e19134. doi: 10.7717/peerj.19134 (PMC12034242; doi:10.7717/peerj.19134)
Supplement: Supplemental Information 1 — The data was tabulated before analyses were performed. [file peerj-13-19134-s001.xlsx]

## Sheet: Sheet1
NAME	AGE	GENDER	YEAR OF PRESENTATION	NASAL BLOCKAGE	RHINORRHEA/PND	FACIAL PAIN/HEADACHE	HYPOSMIA	MUCOPURULENT DISCHARGE	POLYP GRADING	SURGERY	YEAR OF SURGERY	NUMBER OF SURGERY	MEDICAL TREATMENTS	*NOTE	HPE		GRAM STAIN		ORGANISM		BIOFILM
															RIGHT	LEFT	RIGHT	LEFT	RIGHT	LEFT	RIGHT	LEFT
CRS001	63	M	2016-12-01	BILATERAL	PND, RHINORRHEA	NO	NO	NO	BILATERAL 2	NIL	NIL	NIL	KLACCID 6 WEEKS DEC 2016, NASONEX	ASTHMA, HPT, DYSLIPIDEMIA	NO	NO	NO	NO	NG	NG
CRS002	78	F	2014-05-01	BILATERAL	RHINORRHEA	YES	NO	NO	BILATERAL 1	NIL	NIL	NIL	NIL	HEP B, LIVER CIRRHOSIS	NO	NO	NO	NO	CONS	NG
CRS003	68	M	2019-03-14	BILATERAL	RHINORRHEA	NO	YES	NO	BILATERAL 2	NIL	NIL	NIL	NIL	GERD	NO	YES	NO	YES BIOFILM GRAM POS RODS	NG	NG
CRS004	51	M	1995-06-01	BILATERAL	PND	NO	YES	NO	BILATERAL 1	MULTIPLE POLYPECTOMY	1	1	KLACCID 6 WEEKS: JAN 2009, MAY 2009, DEC 2009, APRIL 2010, AUG 2010, NOV 2010, JUNE 2011, SEPT 2012, AUG 2013, FEB 2014, MARCH 2016	NIL	NO	YES	NO	YES (BIOFILM GRAM POS COCCI)	NG	NG
CRS005	36	M	MARCH2016 (5YEARS HX)	BILATERAL	YES	NO	YES	YES	3	FULL FESS AND SEPTO	2016-12-01	1	KALCCID 6 WEEKS MARCH2016,AUG2016 AUGMENTIN 1 WEEK PRIOR OP	NIL	NO	YES	NO	NO	NG	NG
CRS006	73	M	2007-08-01	BILATERAL	PND, RHINORRHEA	NO	NO	NO	BILATERAL 1	NIL	NIL	NIL	NIL	BPH, GASTRITIS	NO	NO	NO	NO	CONS	NG
CRS007	75	M	1999-03-01	BILATERAL	PND	NO	NO	NO	BILATERAL 1	FESS 1997	1	1	AUGMENTIN JAN 2006, KLACCID: SEPT 2007, AUGMENTIN: AUG 2008, KLACCID: JULY 2011	OA, LPR	NO	NO	NO	NO	NG	CONS
CRS008	56	M	2017-09-01	BILATERAL	RHINORRHEA	NO	YES	NO	BILATERAL 1	NIL	NIL	NIL	KLACCID 6 WEEKS: SEPT 2017	NIL	NO	YES	NO	YES (BIOFILM GRAM POS COCCI)	NG	NG
CRS009	42	M	2016-01-01	BILATERAL	YES	NO	NO	NO	RIGHT 3 LEFT 3	FESS	MARCH 2006,FEB 2007,SEPT2012, NOV 2016	4	KLACCID FOR 6 WEEKS: 2006,2007,2008,2014,2016	GASTRITIS	YES	YES	YES (+RODS) BIOFILM SEEN	YES (BIOFILM	NG	AEROMONAS SALMONICIDA
CRS010	26	F	2013-02-01	RIGHT	RHINORRHEA	YES	NO	NO	RIGHT 2, LEFT 3	FESS 2009	2009	1	KLACCID SEPT 2017	NIL	NO	NO	NO	NO	NG	CONS
CRS011	32	M	NOV2014 (3 YEARS HX)	LEFT	PND	NO	YES	NO	2	FULL FESS	2016-01-01	1	KLACCID 6 WEEKS APRIL 2015, JAN 2016, MAY 2016	NIL	NO	NO	NO	NO	STAPH CHROMOGENES	NG
CRS012	58	F	1999-03-01	BILATERAL	YES(PND)	YES	NO	NO	BIALTERAL 1	NIL	NIL	NIL	KLACCID 6 WEKS AUG 2015	ASTHMA, ALLERGIC TO SALTED FISH & DUST	NO	NO	NO	NO	STAPH.EPIDERMIDIS, BURKKHOLDERIA CEPACIA, KLEBSIELLA	STAPH.EPIDERMIDIS, BURKKHOLDERIA CEPACIA
CRS013	75	M	2006-02-01	BILATERAL	RHINORRHEA	NO	NO	NO	BILATERAL 2	NIL	NIL	NIL	KLACCID 6 WEEKS: MARCH 2011, JULY 2013	HPT, DYSLIPIDEMIA	NO	NO	NO	NO	STAPH AURICULARIS, STAPH HOMINIS	STAPH AURICULARIS, STAPH HOMINIS
CRS014	62	F	2010-07-01	BILATERAL	RHINORRHEA	NO	NO	YES	BILATERAL 1	NIL	NIL	NIL	KLACCID 6 WEEKS APRIL 2017	HPT, DYSLIPIDEMIA	NO	NO	NO	NO	NG	STREPTOCOCCUS, E.COLI, CANDIDA KRUSEI
CRS015	31	M	JAN2016 (2 YEARS HX)	BILATERAL	RHINORRHEA	NO	NO	NO	2	NULL	NULL	NULL	NASONEX BD	KIMURA DISEASE OF LEFT PAROTID GLAND	YES	NO	YES	NO	Pseudomonas aeruginosa	NG
CRS016	37	M	DEC2016 (3 YEARS HX)	BILATERAL	PND	YES	YES	YES	1	FULL FESS	FEB 2013,APRIL 2014, JAN 2016, FEB 2017	4	ZINNAT 2 WEEK MARCH 2018, NASONEX BD, ALKALINE DOUCHE	ALERGIC TO KLACCID, AUGMENTIN, ASTHMA	NO	NO	NO	NO	NG	Achromobacter xylosoxidans
CRS017	74	M	2014-02-01	BILATERAL	PND	YES	NO	NO	BILATERAL 2	NIL	NL	NIL	KLACCID 6 WEEKS: FEB 2014, NOV 2017	GLAUCOMA	NO	NO	NO	NO	NG	NG
CRS018	57	M	1998-12-01	BILATERAL	YES	NO	YES	NO	RIGHT 1 LEFT 1	FESS, SEPTOPLASTY	1986,1999, 2002(SEPTO)	3	AZITHROMYCIN 2008	DM, HPT, IHD	YES	NO	YES	NO	Staph.epidermidis, Staph aureus	S. auricularis, Staph epidermidis
CRS019	62	M	NOV 2017( SINCE 1999)	BILATERAL	PND	YES	YES	NO	2	FULL FESS,SPHENOIDOTOMY,FRONTAL SINUSOTOMY, TURIBINOPLASTY	YEAR1995,1999,2002(TWICE),MARCH 2018	5	AUGMENTIN 1 WEEK PRIOR TO OP MARCH 2018, NASONEX BD	BPPV, DM, HPT	YES	YES	YES	YES	Pseudomonas aeurginosa	Pseudomonas aeurginosa
CRS020	44	F	JULY 2017 (>5 YEARS HX)	BILATERAL	RHINORRHEA	NO	YES	NO	RIGHT 2 LEFT 3	FULL FESS AND TIT	2018-06-01	1	KLACCID 6 WEEKS IN FEB 2018	ASTHMA, MILD OSA, HPT	NO	NO	NO	NO	NG	NG
CRS021	57	M	2010-07-01	LEFT	RHINORRHEA	NO	NO	NO	BILATERAL 2	FESS, TIT, SEPTOPLASTY APRIL 2018	2018-04-01	1	KLACCID 6 WEEKS: JULY 2010, JAN 2011, MAY 2012, JAN 2013, AUG 2013, NOV 2014,JAN 2015, DEC 2015, MARCH 2016	GASTRITIS	NO	NO	NO	NO	NG	NG
CRS022	74	M	2002-10-01	BILATERAL	PND	YES	YES	NO	BILATERAL 1	FESS 2006	2006	1	KLACCID 6 WEEKS JULY 2017	HPT, THYROTOXICOSIS	NO	NO	NO	NO	NG	NG
CRS023	78	F	2013-12-01	BILATERAL	RHINORRHEA	NO	NO	NO	BILATERAL 2	NIL	NIL	NIL	KLACCID 6 WEEKS: 2010, DEC 2013, FEB 2014, JAN 2016, MARCH 2017	BPPV	YES	NO	YES	NO	Staph. aureus, Burkholderia cepacia,Staph. epidermidis	Burkholderia cepacia
CRS024	76	M	2001-01-01	BILATERAL	RHINORRHEA	NO	YES	YES	BILATERAL 2	NIL	NIL	NIL	KLACCID 6 WEEKS IN AUGUST 2015	HPT, DM	NO	NO	NO	NO	Burkholderia cepacia, Diptheroids	Staph. epidermidis
CRS025	71	F	2017-11-01	BILATERAL	PND	NO	YES	NO	BILATERAL 2	NIL	NIL	NIL	KLACCID 6 WEEKS: MAY 2011, MARCH 2014, JUNE 2015, OCT 2016	LPR, IHD, ASTHMA	NO	NO	NO	NO	Burkholderia cepacia, Staph. epidermidis	NG
CRS026	73	M	NOV2016 (30 YEARS HX)	BILATERAL	PND, RHINORRHEA	NO	NO	NO	2	FULL FESS	2017-05-01	1	KLACCID 6 WEEKS JUNE 2016, VIT C	BPH	YES	NO	YES (+RODS)	NO	NG	NG
CRS027	64	M	DEC2007 (6 MONTHS HX)	BILATERAL	RHINORRHEA	NIL	NIL	NIL	2	NULL	NIL	NIL	NASONEX BD	HPT	NO	NO	NO	NO	NG	NG
CRS028	63	M	MAY 2018 ( 3 YEARS HX)	BILATERAL	PND	YES	YES	YES	3	POLYPECTOMY AND SEPTO	2016	1	AUGMENTIN FOR 2 WEEKS JULY 2018,NASONEX BD	ASTHMA	NO	NO	NO	NO	NG	NG
CRS029	66	F	JULY 2018 (>5 YEARS HX)	BILATERAL	PND	NO	YES	NO	RIGHT 3 LEFT 2	NIL	NIL	NIL	KLACCID FOR 6 WEEKS JULY 2018	ASTHMA, COLON CA, HYPOTHRYROIDISM, HPT	YES	NO	YES (+COCCI)	NG	NG	NG
CRS030	58	F	2013-12-01	BILATERAL	RHINORRHEA	NO	NO	YES	BILATERAL 2	FESS JUNE 2014	1	1	KLACCID: DEC 2013, MAY 2014, JUNE 2014, AUG 2014, SEPT 2014	ALLERGIC TO NSAIDS, ASTHMA, GLAUCOMA	YES	NO	YES BIOFILM GRAM POS COCCI	NO	NG	NG

## Sheet: Sheet2
DATE	NAME	SAMPLES	BIOFILM		REDUCTION OF BIOFILM %
					NS	BS
2017-08-03	CRS001	MN/17001	NO
		MN/17002	NO
2017-08-24	CRS002	MN/17005	NO
		MN/17006	NO
2017-08-24	CRS003	MN/17003	NO
		MN/17004	NO
2017-09-07	CRS004	MN/17007	NO
		MN/17008	NO
2017-09-14	CRS005	MN/17009	NO
		MN/17010	NO
2017-09-14	CRS006	MN/17011	NO
		MN/17012	NO
2017-09-21	CRS007	MN/17015	NO
		MN/17016	NO
2017-09-21	CRS008	MN/17013	NO
		MN/17014	NO
2017-09-21	CRS009	MN/17017	NO
		MN/17018	NO
2017-09-28	CRS010	MN/17019	NO
		MN/17020	NO
2018-01-04	CRS011	MN/17021	NO
		MN/17022	NO
2018-01-11	CRS012	MN/17025	NO
		MN/17026	NO
2018-01-16	CRS013	MN/17027	NO
		MN/17028	NO
2018-01-18	CRS014	MN/17029	NO
		MN/17030	NO
2018-01-18	CRS015	MN/17039	YES(STRONG) PA		7.3	50.1
		MN/17040	NO
2018-03-08	CRS016	MN/17031	NO
		MN/17032	NO
2018-03-22	CRS017	MN/17033	NO
		MN/17034	NO
2018-03-27	CRS018	MN/17035	YES(STRONG) SA		57.3	77.8
		MN/17036	NO
2018-03-30	CRS019	MN/17037	YES (STRONG) PA		30.4	30.4
		MN/17038	YES(STRONG) PA		39.4	58.4
2018-04-05	CRS020	MN/17041	NO
		MN/17042	NO
2018-04-06	CRS021	MN/17043	NO
		MN/17044	NO
2018-04-19	CRS022	MN/17045	NO
		MN/17046	NO
2018-05-24	CRS023	MN/17049	YES(WEAK) SA		0	29.4
		MN/17050	NO
2018-05-24	CRS024	MN/17051	NO
		MN/17052	NO
2018-05-31	CRS025	MN/17053	NO
		MN/17054	NO
2018-06-25	CRS026	MN/17055	NO
		MN/17056	NO
2018-06-28	CRS027	MN/17055	NO
		MN/17056	NO
2018-07-05	CRS028	MN/17061	NO
		MN/17062	NO
2018-07-05	CRS029	MN/17059	NO
		MN/17060	NO
2018-08-05	CRS030	MN/17047	NO
		MN/17048	NO
